# Supplementary material for: Heat, Heat Waves, and Hospital Admissions among the Elderly in the United States, 1992–2006
Source: PubMed Central journal article supplement (PMC4216145; doi:10.1289/ehp.1206132), 2014-06-06
Supplement: ehp.1206132.s001.508.pdf [file ehp.1206132.s001.508.pdf]

## **Supplemental Material**

### **Heat, Heat Waves, and Hospital Admissions among the Elderly in the United States, 1992–2006**

Carina J. Gronlund, Antonella Zanobetti, Joel D. Schwartz, Gregory A. Wellenius, and Marie S. O'Neill

| <b>Table of Contents</b>                                                                      | <b>Page</b> |
|-----------------------------------------------------------------------------------------------|-------------|
| <b>Figure S1.</b> Map of the 114 U.S. study cities                                            | 2–3         |
| <b>Figure S2.</b> Temperature-hospital admission association in New York City, NY             | 4           |
| <b>Figure S3.</b> Percent increases in hospital admissions for 3 time stratum lengths         | 5           |
| <b>Figure S4.</b> Percent increases in hospital admissions for different temperature metrics  | 6           |
| <b>Figure S5.</b> Percent increases in hospital admissions for 8 different models in 5 cities | 7           |
| <b>Study Cities and Climate Zones Methods</b>                                                 | 8           |
| <b>Alternative Threshold Identification Using SiZer</b>                                       | 8           |
| <b>Methods</b>                                                                                | 8           |
| <b>Results</b>                                                                                | 8           |
| <b>References</b>                                                                             | 9           |

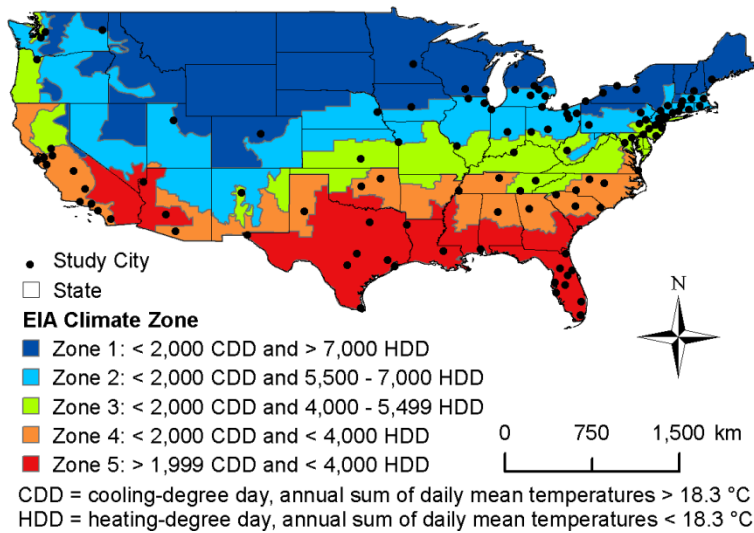

|                         |                     |                           |                              |
|-------------------------|---------------------|---------------------------|------------------------------|
| Akron, OH               | Columbia, SC        | Indianapolis, IN          | Nashua, NH                   |
| Albuquerque, NM         | Columbus, OH        | Jacksonville, FL          | Nashville, TN                |
| Allentown-Bethlehem, PA | Dallas, TX          | Jersey City, NJ           | Newark, NJ                   |
| Atlanta, GA             | Daytona Beach, FL   | Kansas City, MO-KS        | Newburgh, NY                 |
| Atlantic City, NJ       | Dayton, OH          | Knoxville, TN             | New Haven-Meriden, CT        |
| Austin, TX              | Denver, CO          | Lakeland-Winter Haven, FL | New London, CT               |
| Bakersfield, CA         | Des Moines, IA      | Lansing, MI               | New York, NY                 |
| Baltimore, MD           | Detroit, MI         | Las Vegas, NV-AZ          | Oakland, CA                  |
| Bergen-Passaic, NJ      | Dutchess County, NY | Los Angeles, CA           | Ocala, FL                    |
| Birmingham, AL          | El Paso, TX         | Louisville, KY            | Oklahoma City, OK            |
| Boston, MA              | Erie, PA            | Lubbock, TX               | Omaha, NE                    |
| Baton Rouge, LA         | Flint, MI           | Madison, WI               | Orange County, CA            |
| Brownsville, TX         | Fresno, CA          | Memphis, TN               | Orlando, FL                  |
| Buffalo, NY             | Galveston, TX       | Miami, FL                 | Philadelphia, PA-NJ          |
| Canton-Massillon, OH    | Gary, IN            | Middlesex, NJ             | Phoenix, AZ                  |
| Charleston, WV          | Grand Rapids, MI    | Milwaukee, WI             | Pittsburgh, PA               |
| Charlotte, NC           | Greensboro, NC      | Minneapolis-St. Paul, MN  | Portland, ME                 |
| Chattanooga, TN         | Greenville, SC      | Mobile, AL                | Portland, OR                 |
| Chicago, IL             | Hartford, CT        | Monmouth-Ocean, NJ        | Providence-Fall River, RI-MA |
| Cleveland, OH           | Houston, TX         | Myrtle Beach, SC          |                              |

|                        |                                          |                                         |                                   |
|------------------------|------------------------------------------|-----------------------------------------|-----------------------------------|
| Raleigh, NC            | Scranton--Wilkes-Barre--<br>Hazleton, PA | St. Louis, MO-IL                        | Ventura County, CA                |
| Reading, PA            | San Diego, CA                            | Stockton-Lodi, CA                       | Virginia Beach, VA                |
| Rochester, NY          | Seattle, WA                              | Syracuse, NY                            | Washington, DC-MD-VA              |
| Rockford, IL           | San Francisco, CA                        | Tacoma, WA                              | Wichita, KS                       |
| Sacramento, CA         | Shreveport, LA                           | Tampa-St. Petersburg-<br>Clearwater, FL | Wilmington, DE                    |
| Saginaw, MI            | San Jose, CA                             | Toledo, OH                              | Worcester, MA                     |
| Salt Lake City, UT     | Spokane, WA                              | Trenton, NJ                             | West Palm Beach-Boca<br>Raton, FL |
| San Antonio, TX        | Springfield, MA                          | Tucson, AZ                              | Youngstown-Warren, OH             |
| Sarasota-Bradenton, FL | Stamford-Norwalk, CT                     | Tulsa, OK                               |                                   |

**Figure S1.** Map of the 114 U.S. study cities and their corresponding Energy Information Administration (EIA) climate zones (Energy Information Administration 2010).

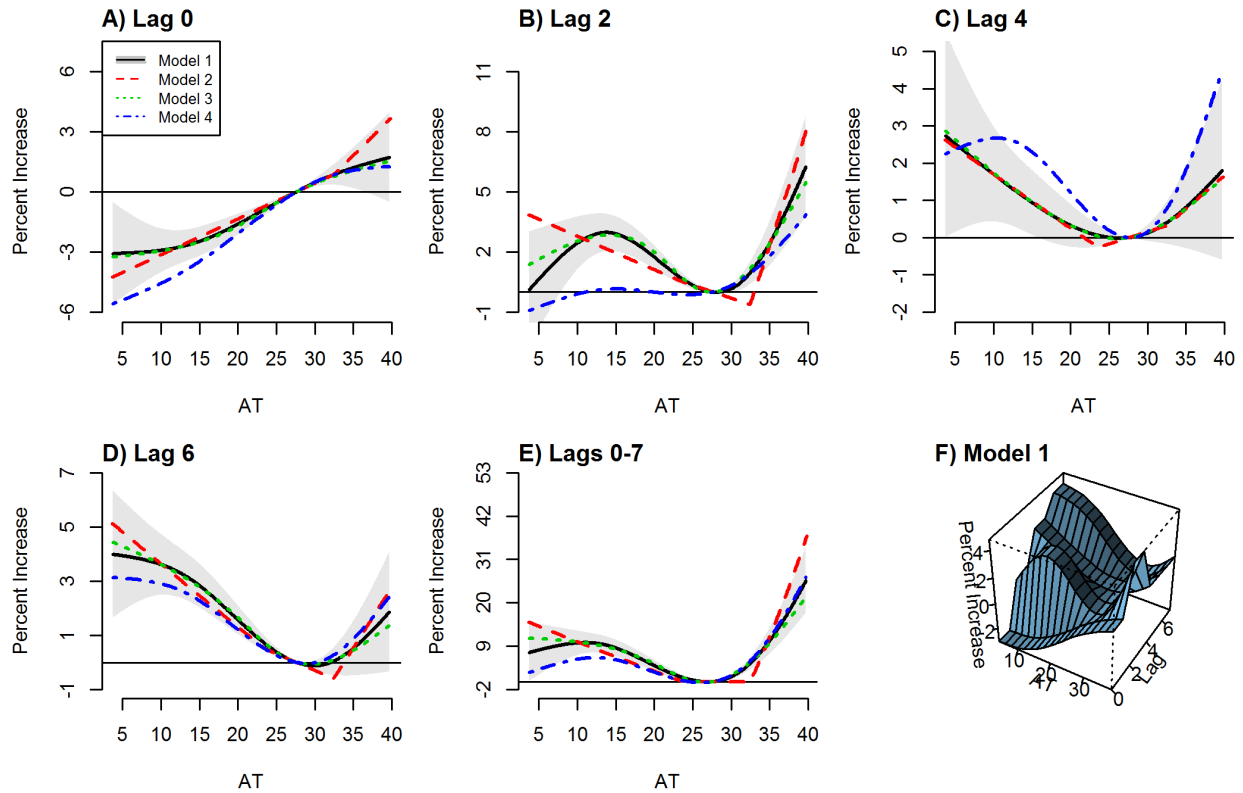

Model 1: Natural cubic spline (NCS), knots at 10th and 90th pctls of AT, 4 lag strata  
 Model 2: Piecewise linear spline, knots at 50th and 95th pctls of AT, 4 lag strata  
 Model 3: NCS, knots at 33rd and 67th pctls of AT, 4 lag strata  
 Model 4: NCS, knots at 10th and 90th pctls of AT, NCS lag with 3 df

**Figure S2.** Percent increases in all-cause hospital admissions for apparent temperature (AT) vs. the 75<sup>th</sup> percentile of AT among New York City, NY elderly (May-September, 1992-2006) at lag day 0 (A), lag day 2 (B), lag day 4 (C), lag day 6 (D), and over lag days 0-7 (E) for models 1-4 and for model 1 at all lags (F). Gray shading represents 95% confidence interval for Model 1.

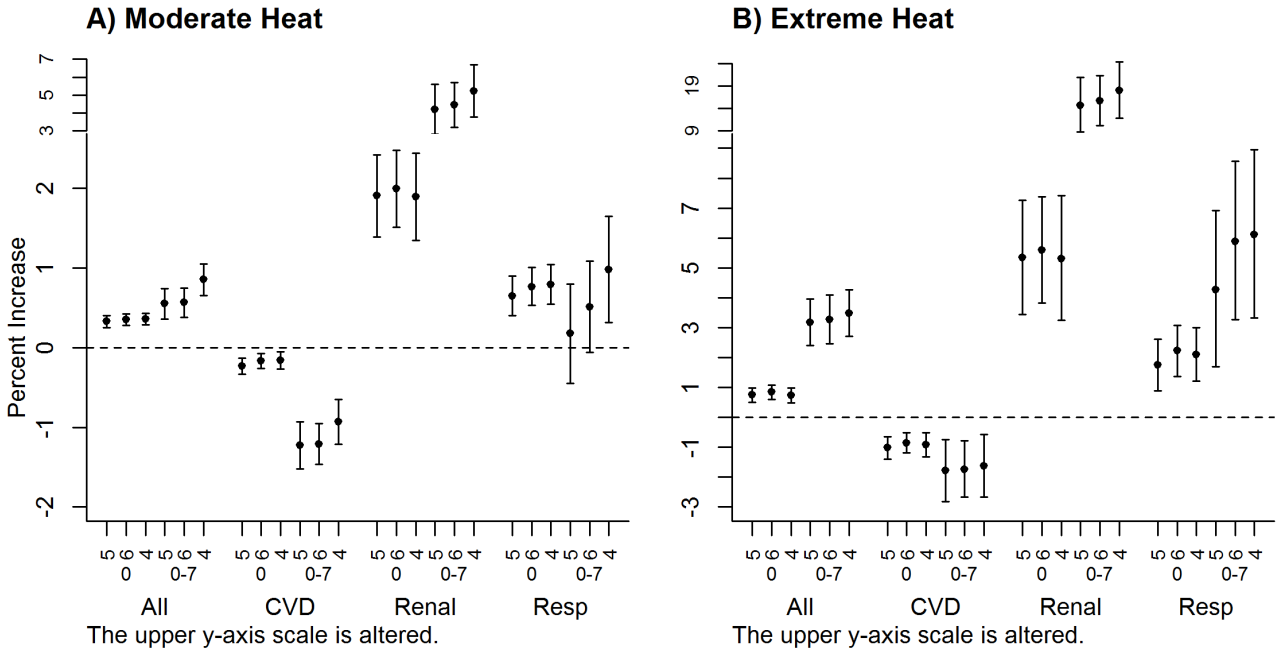

**Figure S3.** Percent increases and 95% confidence intervals (CIs) for all cities in hospital admissions among U.S. elderly (May-September, 1992-2006) at lag 0 and the over lags 0-7 for 3 time stratum lengths of 5 (30-31 days per time stratum), 6 (25-26 days per time stratum) and 4 (38-39 days per time stratum) for (A) moderate heat (90<sup>th</sup> vs. 75<sup>th</sup> percentile of AT), and (B) extreme heat (99<sup>th</sup> vs. 75<sup>th</sup> percentile of AT).

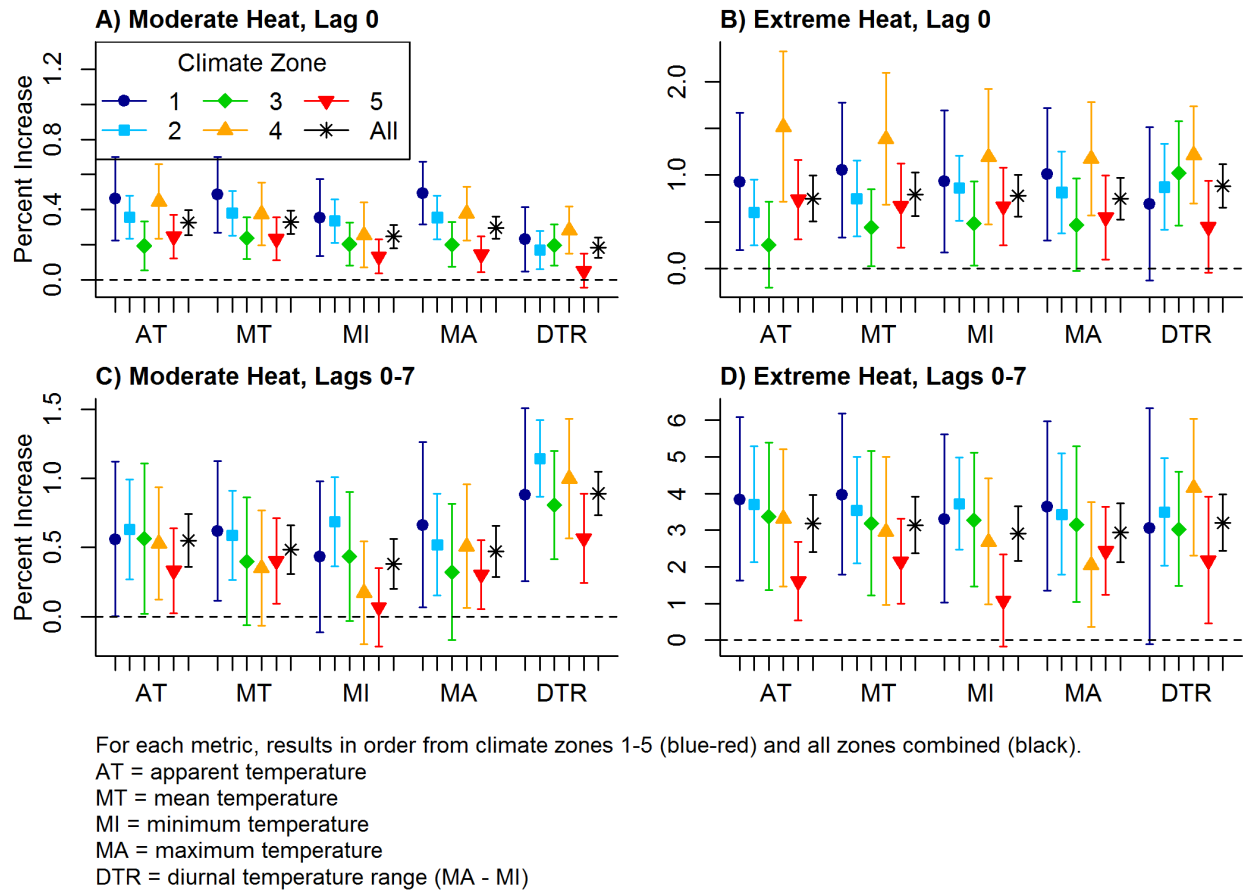

**Figure S4.** Percent increases and 95% confidence intervals in hospital admission among U.S. elderly (1992-2006) for all natural causes for different temperature metrics for moderate heat (90<sup>th</sup> vs. 75<sup>th</sup> percentile of temperature) (A, C) and extreme heat (99<sup>th</sup> vs. 75<sup>th</sup> percentile of temperature) (B, D) for lag days 0 (A, B) and over lag days 0-7 (C, D).

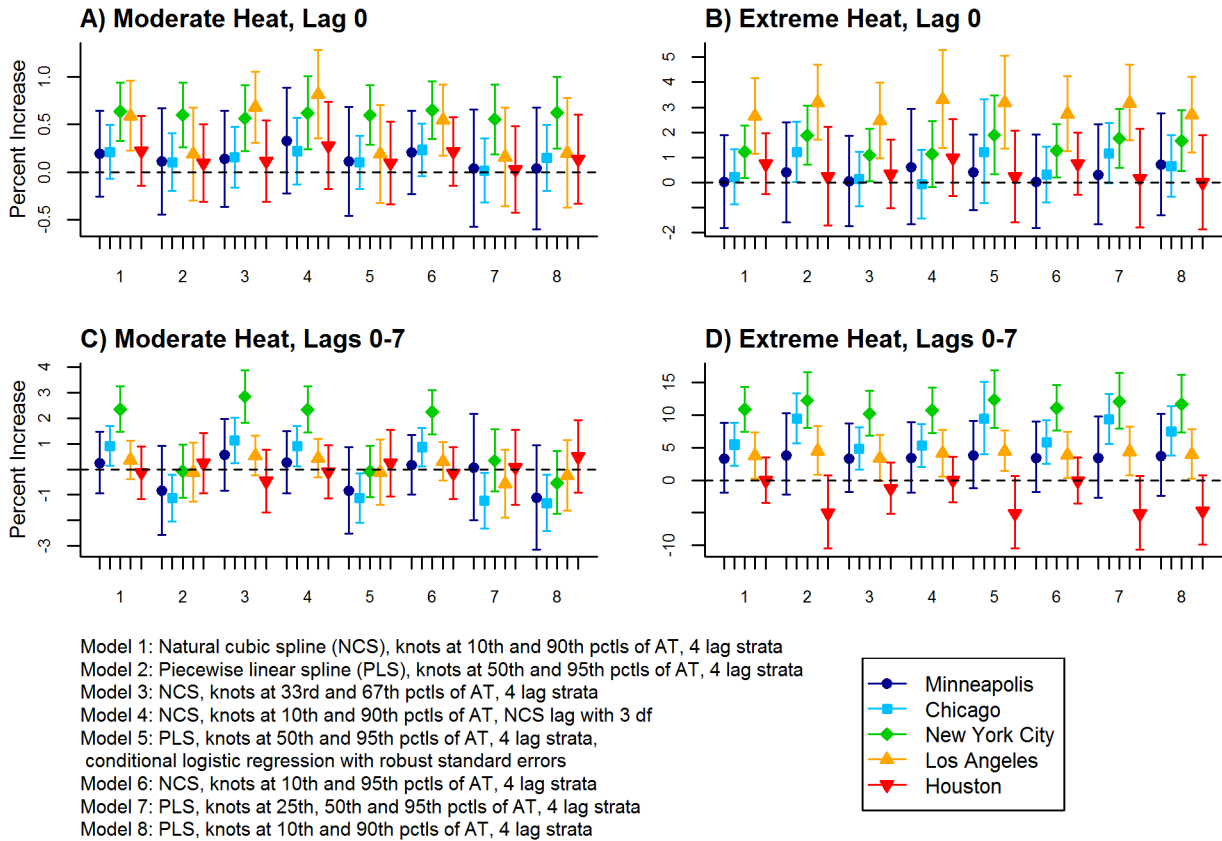

**Figure S5.** Percent increases and 95% confidence intervals in hospital admissions for all causes among the elderly in the largest city in each of 5 climate zones (May-September, 1992-2006) for moderate heat (90<sup>th</sup> vs. 75<sup>th</sup> percentile of apparent temperature) (graphs A, C) and extreme heat (99<sup>th</sup> vs. 75<sup>th</sup> percentile of apparent temperature) (B, D) at lag day 0 (A, B) and over lag days 0-7 (C, D) for different models.

## **Study Cities and Climate Zones Methods**

U.S. counties were ranked according to the number of hospital admissions due to cardiovascular disease from 2004-2006. Of the 200 counties with the most cardiovascular admissions, 196 counties were within Metropolitan Statistical Areas (MSAs) in the continental U.S. and were assigned to their respective MSAs to form the “cities” in this study. The MSAs of Denver, CO, Portland, OR and Albuquerque, NM, though large, did not contain counties among the 200 counties with the highest number of cardiovascular hospital admissions, so the counties of Denver, CO, Jefferson, CO, Multnomah, OR, Clackamas, OR, Washington, OR and Bernalillo, NM were added. Cities were assigned to 5 climate regions using the U.S. Department of Energy, Energy Information Administration's climate zones (Energy Information Administration (EIA) 2010), defined by numbers of cooling-degree days (annual sum of daily mean temperatures above 18.3°C) and heating-degree days (annual sum of daily mean temperatures below 18.3°C).

## **Alternative Threshold Identification Using SiZer**

### **Methods**

We attempted to identify heat and cold thresholds at lags 0-1 and 2-3 using the SiZer method, which identifies significant increases or decreases in locally weighted polynomial smoothers for different spans of the smoother (Chaudhuri and Marron 1999). The motivation for doing this was to potentially provide a more objective way of identifying thresholds by exploring the full range of smoothing approaches (from very little smoothing to a great deal). For each city, we performed a time stratified case-crossover analysis using Poisson regression (Lu and Zeger 2006) of the association between daily hospital admissions counts and AT01 and AT23 as natural cubic splines with 3 df. The SiZer scatterplot was created from the AT values and partial residuals for each lag, and smoothers with differing bandwidths were fit to that scatterplot. For each city for each lag, we tested approximately 20-30 bandwidths (1 for each degree Celsius in the range of ATs for that city), and the bandwidths ranged from  $\log_{10}(h) = 0$  to 2.

### **Results**

The SiZer method did not allow us to identify clear heat and cold thresholds in many cities. Often, a smoother with a small span (a very “wiggly” smoother) had multiple significant increases and decreases in its slope and a smoother with a large span significantly increased (or decreased) over the full range of AT values at that particular 2-day lag, without any threshold. Furthermore, the point at which the function began to increase, decrease or flatten often depended entirely on the span chosen. This suggests that the threshold approach may not fit the data well, or may not be estimable.



## References

- Chaudhuri P, Marron JS. 1999. SiZer for exploration of structures in curves. J Am Stat Assoc 94:807-823.
- EIA (Energy Information Administration). 2010. U.S. Climate Zones for 2003 CBECS. Commercial Buildings Energy Consumption Survey:U.S. Department of Energy. [http://www.eia.doe.gov/emeu/cbecs/climate\\_zones.html](http://www.eia.doe.gov/emeu/cbecs/climate_zones.html)
- Lu Y, Zeger SL. 2006. On the equivalence of case-crossover and time series methods in environmental epidemiology. Biostatistics 8:337-344.
